# Supplementary material for: Simultaneous Optimization of Ultrasound-Assisted Extraction for Flavonoids and Antioxidant Activity of Angelica keiskei Using Response Surface Methodology (RSM)
Source: PubMed Central journal article supplement (PMC6804174; doi:10.3390/molecules24193461), 2019-09-24
Supplement: molecules-24-03461-s001.pdf [file molecules-24-03461-s001.pdf]

Supplementary Information

# Simultaneous Optimization of Ultrasound-Assisted Extraction for Flavonoids and Antioxidant Activity of *Angelica keiskei* Using Response Surface Methodology (RSM)

Lei Zhang <sup>1,2</sup>, Yuhuan Jiang <sup>1</sup>, Xuening Pang <sup>1</sup>, Puyue Hua <sup>1</sup>, Xiang Gao <sup>1</sup>, Qun Li <sup>2,\*</sup> and Zichao Li <sup>1,2,3,\*</sup>

<sup>1</sup> College of Life Sciences, Institute of Advanced Cross-Field Science, Institute of *Angelica keiskei* Health Industry Technology, Qingdao University, Qingdao 266071, China; 2017020832@qdu.edu.cn (L.Z.); 2018025210@qdu.edu.cn (Y.J.); 2018025216@qdu.edu.cn (X.P.); h13399545149@163.com (P.H.); gaoxiang@qdu.edu.cn (X.G.)

<sup>2</sup> College of Chemistry and Chemical Engineering, Qingdao University, Qingdao 266071, China;

<sup>3</sup> Qingdao Balanson Biotech Co., Ltd., Qingdao 266071, China

\* Correspondence: zichaoli@qdu.edu.cn (Z.L.); qunli@qdu.edu.cn (Q.L.);  
Tel.: +86-532-8595-0705 (Q.L.)

**Table S1 Analysis of variance (ANOVA) for ultrasonic temperature on the TFC.**

| Source                 | Sum of squares | Degree of freedom | Mean square | F-value | p-value | Significant <sup>1</sup> |
|------------------------|----------------|-------------------|-------------|---------|---------|--------------------------|
| Ultrasonic temperature | 0.472          | 5                 | 0.094       | 8.280   | 0.001   | ***                      |
| Error                  | 0.137          | 12                | 0.011       |         |         |                          |
| Total                  | 0.609          | 17                |             |         |         |                          |

<sup>1</sup> \*: indicate significant level (0.01 < p-value ≤ 0.05); \*\*: indicate highly significant level (0.001 < p-value ≤ 0.01);  
\*\*\*: indicate remarkably significant level (p-value ≤ 0.001).

**Table S2 ANOVA for ultrasonic time on the TFC.**

| Source          | Sum of squares | Degree of freedom | Mean square | F-value | p-value | Significant <sup>1</sup> |
|-----------------|----------------|-------------------|-------------|---------|---------|--------------------------|
| Ultrasonic time | 1.169          | 9                 | 0.130       | 12.171  | <0.0001 | ***                      |
| Error           | 0.213          | 20                | 0.011       |         |         |                          |
| Total           | 1.382          | 29                |             |         |         |                          |

<sup>1</sup> \*: indicate significant level (0.01 < p-value ≤ 0.05); \*\*: indicate highly significant level (0.001 < p-value ≤ 0.01);  
\*\*\*: indicate remarkably significant level (p-value ≤ 0.001).

**Table S3 ANOVA for ethanol concentration on the TFC.**

| Source                | Sum of squares | Degree of freedom | Mean square | F-value | p-value | Significant <sup>1</sup> |
|-----------------------|----------------|-------------------|-------------|---------|---------|--------------------------|
| Ethanol concentration | 31.368         | 5                 | 6.274       | 123.324 | <0.0001 | ***                      |
| Error                 | 0.610          | 12                | 0.051       |         |         |                          |
| Total                 | 31.978         | 17                |             |         |         |                          |

<sup>1</sup> \*: indicate significant level (0.01 < p-value ≤ 0.05); \*\*: indicate highly significant level (0.001 < p-value ≤ 0.01);  
\*\*\*: indicate remarkably significant level (p-value ≤ 0.001).

**Table S4 ANOVA for liquid-solid ratio on the TFC.**

| Source             | Sum of squares | Degree of freedom | Mean square | F-value | p-value | Significant <sup>1</sup> |
|--------------------|----------------|-------------------|-------------|---------|---------|--------------------------|
| Liquid-solid ratio | 1.932          | 5                 | 0.386       | 15.403  | <0.0001 | ***                      |
| Error              | 0.301          | 12                | 0.025       |         |         |                          |
| Total              | 2.234          | 17                |             |         |         |                          |

<sup>1</sup> \*: indicate significant level ( $0.01 < p\text{-value} \leq 0.05$ ); \*\*: indicate highly significant level ( $0.001 < p\text{-value} \leq 0.01$ ); \*\*\*: indicate remarkably significant level ( $p\text{-value} \leq 0.001$ ).

**Table S5** ANOVA for the fitted quadratic polynomial model of TFC.

| Source <sup>1</sup>           | Sum of squares          | Degree of freedom | Mean square             | F-value | p-value  | Significant <sup>2</sup> |
|-------------------------------|-------------------------|-------------------|-------------------------|---------|----------|--------------------------|
| Y <sub>TFC</sub> -Model       | 4.53                    | 14                | 0.3232                  | 16.16   | < 0.0001 | ***                      |
| X <sub>1</sub>                | 2.3593×10 <sup>-5</sup> | 1                 | 2.3593×10 <sup>-5</sup> | 0.0012  | 0.9731   |                          |
| X <sub>2</sub>                | 0.0336                  | 1                 | 0.0336                  | 1.68    | 0.2157   |                          |
| X <sub>3</sub>                | 0.7601                  | 1                 | 0.7601                  | 38.00   | < 0.0001 | ***                      |
| X <sub>4</sub>                | 0.9162                  | 1                 | 0.9162                  | 45.81   | < 0.0001 | ***                      |
| X <sub>1</sub> X <sub>2</sub> | 0.1335                  | 1                 | 0.1335                  | 6.68    | 0.0216   | *                        |
| X <sub>1</sub> X <sub>3</sub> | 0.0002                  | 1                 | 0.0002                  | 0.0084  | 0.9285   |                          |
| X <sub>1</sub> X <sub>4</sub> | 0.0280                  | 1                 | 0.0280                  | 1.40    | 0.2561   |                          |
| X <sub>2</sub> X <sub>3</sub> | 0.0394                  | 1                 | 0.0394                  | 1.97    | 0.1825   |                          |
| X <sub>2</sub> X <sub>4</sub> | 0.4316                  | 1                 | 0.4316                  | 21.58   | 0.0004   | ***                      |
| X <sub>3</sub> X <sub>4</sub> | 0.0031                  | 1                 | 0.0031                  | 0.1551  | 0.6997   |                          |
| X <sub>1</sub> <sup>2</sup>   | 0.0411                  | 1                 | 0.0411                  | 2.06    | 0.1735   |                          |
| X <sub>2</sub> <sup>2</sup>   | 0.0006                  | 1                 | 0.0006                  | 0.0319  | 0.8609   |                          |
| X <sub>3</sub> <sup>2</sup>   | 2.09                    | 1                 | 2.09                    | 104.30  | < 0.0001 | ***                      |
| X <sub>4</sub> <sup>2</sup>   | 0.0046                  | 1                 | 0.0046                  | 0.2288  | 0.6398   |                          |
| Residual                      | 0.2800                  | 14                | 0.0200                  |         |          |                          |
| Lack of fit                   | 0.2090                  | 10                | 0.0209                  | 1.18    | 0.4747   |                          |
| Pure error                    | 0.0710                  | 4                 | 0.0178                  |         |          |                          |
| Cor total                     | 4.81                    | 28                |                         |         |          |                          |

<sup>1</sup> X<sub>1</sub>: ultrasonic temperature (°C); X<sub>2</sub>: ultrasonic time (min); X<sub>3</sub>: ethanol concentration (%); X<sub>4</sub>: liquid-solid ratio (mL/g).

<sup>2</sup> \*: indicate significant level ( $0.01 < p\text{-value} \leq 0.05$ ); \*\*: indicate highly significant level ( $0.001 < p\text{-value} \leq 0.01$ ); \*\*\*: indicate remarkably significant level ( $p\text{-value} \leq 0.001$ ).

**Table S6** ANOVA for the fitted quadratic polynomial model of DPPH-RSC.

| Source <sup>1</sup>           | Sum of squares | Degree of freedom | Mean square | F-value | p-value  | Significant <sup>2</sup> |
|-------------------------------|----------------|-------------------|-------------|---------|----------|--------------------------|
| Y <sub>DPPH</sub> -Model      | 39.82          | 14                | 2.84        | 16.46   | < 0.0001 | ***                      |
| X <sub>1</sub>                | 0.9998         | 1                 | 0.9998      | 5.78    | 0.0306   | *                        |
| X <sub>2</sub>                | 1.24           | 1                 | 1.24        | 7.15    | 0.0182   | *                        |
| X <sub>3</sub>                | 24.20          | 1                 | 24.20       | 139.99  | < 0.0001 | ***                      |
| X <sub>4</sub>                | 1.15           | 1                 | 1.15        | 6.67    | 0.0217   | *                        |
| X <sub>1</sub> X <sub>2</sub> | 3.02           | 1                 | 3.02        | 17.49   | 0.0009   | ***                      |
| X <sub>1</sub> X <sub>3</sub> | 0.9346         | 1                 | 0.9346      | 5.41    | 0.0356   | *                        |

|                               |        |    |        |        |        |     |
|-------------------------------|--------|----|--------|--------|--------|-----|
| X <sub>1</sub> X <sub>4</sub> | 1.53   | 1  | 1.53   | 8.84   | 0.0101 | *   |
| X <sub>2</sub> X <sub>3</sub> | 0.0011 | 1  | 0.0011 | 0.0063 | 0.9379 |     |
| X <sub>2</sub> X <sub>4</sub> | 1.18   | 1  | 1.18   | 6.85   | 0.0203 | *   |
| X <sub>3</sub> X <sub>4</sub> | 4.34   | 1  | 4.34   | 25.10  | 0.0002 | *** |
| X <sub>1</sub> <sup>2</sup>   | 0.0198 | 1  | 0.0198 | 0.1143 | 0.7403 |     |
| X <sub>2</sub> <sup>2</sup>   | 0.2725 | 1  | 0.2725 | 1.58   | 0.2298 |     |
| X <sub>3</sub> <sup>2</sup>   | 0.0082 | 1  | 0.0082 | 0.0475 | 0.8307 |     |
| X <sub>4</sub> <sup>2</sup>   | 1.08   | 1  | 1.08   | 6.25   | 0.0254 | *   |
| Residual                      | 2.42   | 14 | 0.1728 |        |        |     |
| Lack of fit                   | 2.01   | 10 | 0.2012 | 1.97   | 0.2682 |     |
| Pure error                    | 0.4082 | 4  | 0.1021 |        |        |     |
| Cor total                     | 42.24  | 28 |        |        |        |     |

39 <sup>1</sup> X<sub>1</sub>: ultrasonic temperature (°C); X<sub>2</sub>: ultrasonic time (min); X<sub>3</sub>: ethanol concentration (%); X<sub>4</sub>: liquid-solid ratio  
 40 (mL/g).

41 <sup>2</sup> \*: indicate significant level (0.01 < *p*-value ≤ 0.05); \*\*: indicate highly significant level (0.001 < *p*-value ≤ 0.01); \*\*\*:  
 42 indicate remarkably significant level (*p*-value ≤ 0.001).

43  
 44

**Table S7** ANOVA for the fitted quadratic polynomial model of FRAP.

| Source <sup>1</sup>           | Sum of squares | Degree of freedom | Mean square | F-value | <i>p</i> -value | Significant <sup>2</sup> |
|-------------------------------|----------------|-------------------|-------------|---------|-----------------|--------------------------|
| Y <sub>FRAP</sub> -Model      | 617.51         | 14                | 44.11       | 16.03   | < 0.0001        | ***                      |
| X <sub>1</sub>                | 37.74          | 1                 | 37.74       | 13.71   | 0.0024          | **                       |
| X <sub>2</sub>                | 32.24          | 1                 | 32.24       | 11.71   | 0.0041          | **                       |
| X <sub>3</sub>                | 338.92         | 1                 | 338.92      | 123.14  | < 0.0001        | ***                      |
| X <sub>4</sub>                | 61.58          | 1                 | 61.58       | 22.37   | 0.0003          | ***                      |
| X <sub>1</sub> X <sub>2</sub> | 8.67           | 1                 | 8.67        | 3.15    | 0.0976          |                          |
| X <sub>1</sub> X <sub>3</sub> | 13.01          | 1                 | 13.01       | 4.73    | 0.0473          | *                        |
| X <sub>1</sub> X <sub>4</sub> | 0.0071         | 1                 | 0.0071      | 0.0026  | 0.9602          |                          |
| X <sub>2</sub> X <sub>3</sub> | 1.29           | 1                 | 1.29        | 0.4690  | 0.5046          |                          |
| X <sub>2</sub> X <sub>4</sub> | 0.3382         | 1                 | 0.3382      | 0.1229  | 0.7311          |                          |
| X <sub>3</sub> X <sub>4</sub> | 6.93           | 1                 | 6.93        | 2.52    | 0.1350          |                          |
| X <sub>1</sub> <sup>2</sup>   | 44.58          | 1                 | 44.58       | 16.20   | 0.0013          | **                       |
| X <sub>2</sub> <sup>2</sup>   | 18.35          | 1                 | 18.35       | 6.67    | 0.0217          | *                        |
| X <sub>3</sub> <sup>2</sup>   | 47.73          | 1                 | 47.73       | 17.34   | 0.0010          | ***                      |
| X <sub>4</sub> <sup>2</sup>   | 65.32          | 1                 | 65.32       | 23.73   | 0.0002          | ***                      |
| Residual                      | 38.53          | 14                | 2.75        |         |                 |                          |
| Lack of fit                   | 29.96          | 10                | 3.00        | 1.40    | 0.4000          |                          |
| Pure error                    | 8.58           | 4                 | 2.14        |         |                 |                          |
| Cor total                     | 656.05         | 28                |             |         |                 |                          |

45 <sup>1</sup> X<sub>1</sub>: ultrasonic temperature (°C); X<sub>2</sub>: ultrasonic time (min); X<sub>3</sub>: ethanol concentration (%); X<sub>4</sub>: liquid-solid ratio  
 46 (mL/g).

47 <sup>2</sup> \*: indicate significant level (0.01 < *p*-value ≤ 0.05); \*\*: indicate highly significant level (0.001 < *p*-value ≤ 0.01); \*\*\*:  
 48 indicate remarkably significant level (*p*-value ≤ 0.001).
